# Supplementary material
Source: MDPI journal article supplement (https://www.mdpi.com/2073-4352/11/3/242)
Supplement: s1 [file s1]

## Supporting Information

### Helimagnetism in $\text{MnBi}_2\text{Se}_4$ Driven by Spin-Frustrating Interactions Between Antiferromagnetic Chains

Judith K. Clark,<sup>a,#</sup> Chongin Pak,<sup>a,b,#</sup> Huibo Cao,<sup>c</sup> Michael Shatruk<sup>a,b,\*</sup>

<sup>a</sup> *Department of Chemistry and Biochemistry, Florida State University, Tallahassee, FL 32306, United States*

<sup>b</sup> *National High Field Magnetic Laboratory, Tallahassee, FL 32310, United States*

<sup>c</sup> *Neutron Scattering Division, Oak Ridge National Laboratory, Oak Ridge, TN 37830, United States*

# Both authors contributed equally to this work.

\* Corresponding author: [mhatruk@fsu.edu](mailto:mhatruk@fsu.edu).

|                                                                                                                    |    |
|--------------------------------------------------------------------------------------------------------------------|----|
| <b>Figure S1.</b> Powder diffraction patterns of $\text{MnSe}$ and $\text{MnBi}_2\text{Se}_4$ precursors .....     | S2 |
| <b>Figure S2.</b> Curie-Weiss fit of the inverse susceptibility for $H \parallel b$ and $H \perp b$ .....          | S3 |
| <b>Figure S3.</b> Intensity of the (0 0.356 2) neutron diffraction peak as a function of temperature .....         | S3 |
| <b>Figure S4.</b> Plot of observed vs. calculated squared structure factors for magnetic structure refinement..... | S4 |

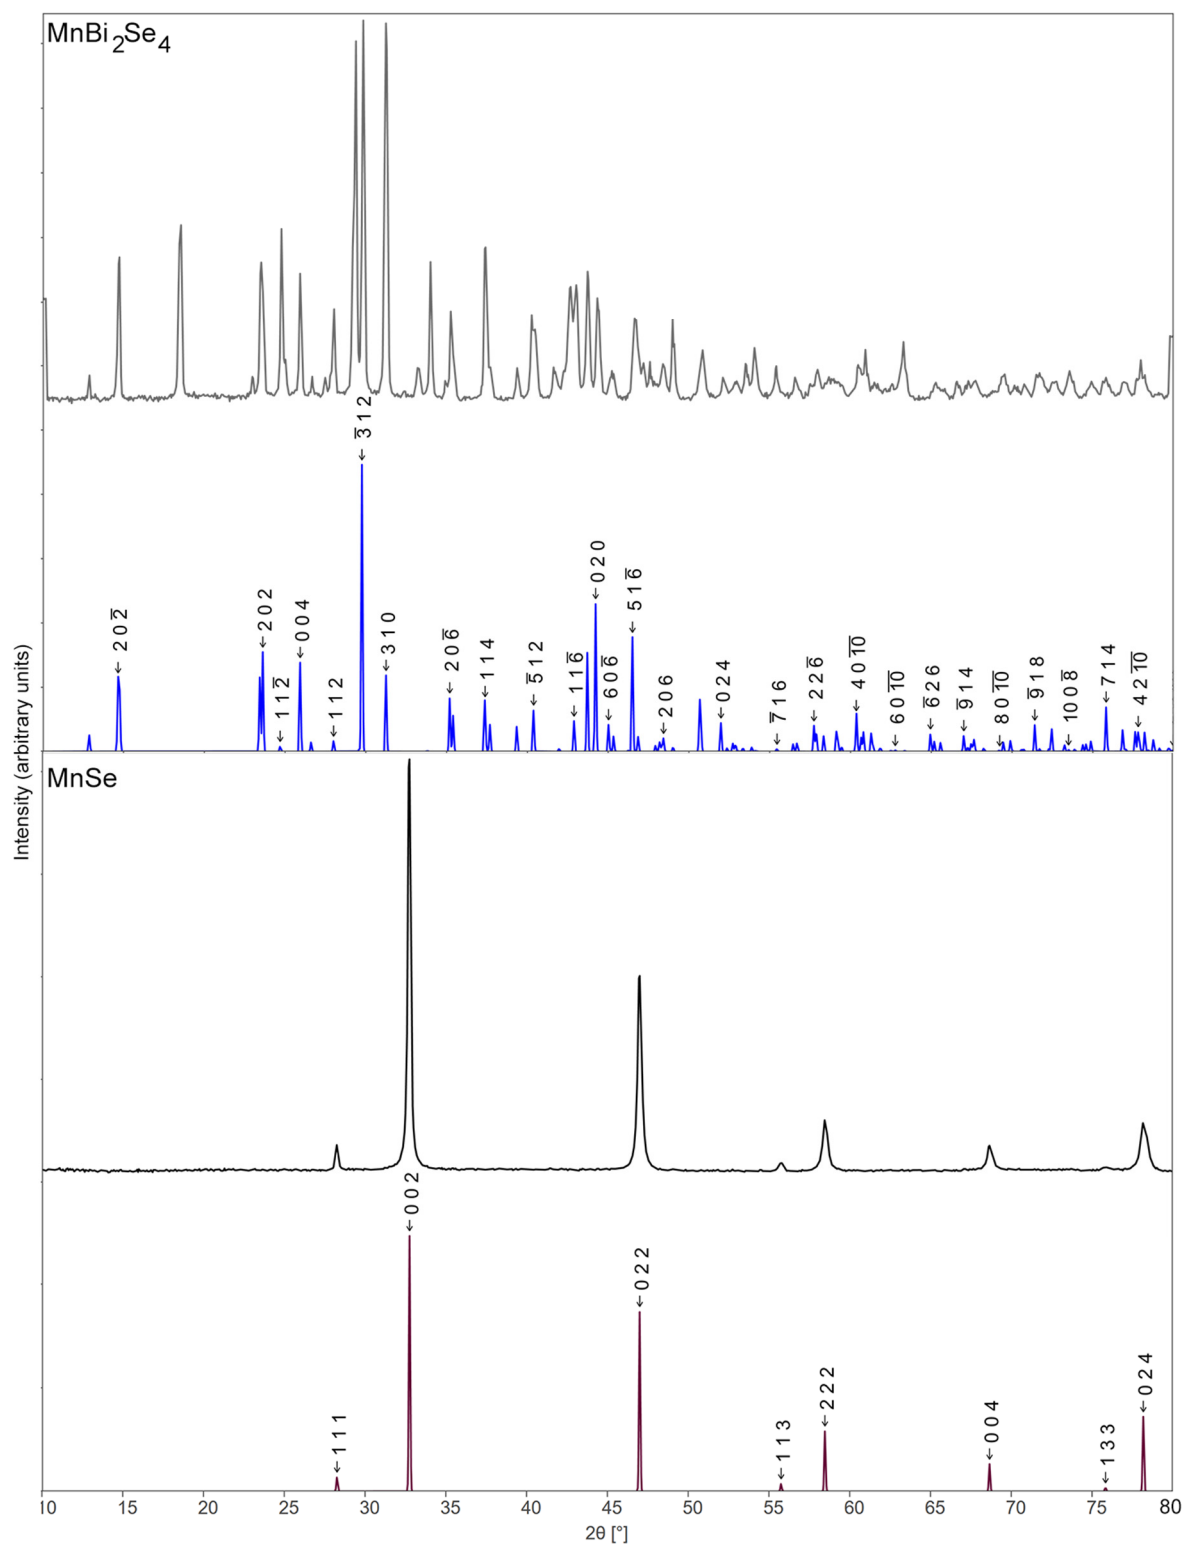

**Figure S1.** Experimental and calculated powder diffraction patterns of MnSe and MnBi<sub>2</sub>Se<sub>4</sub> precursors.

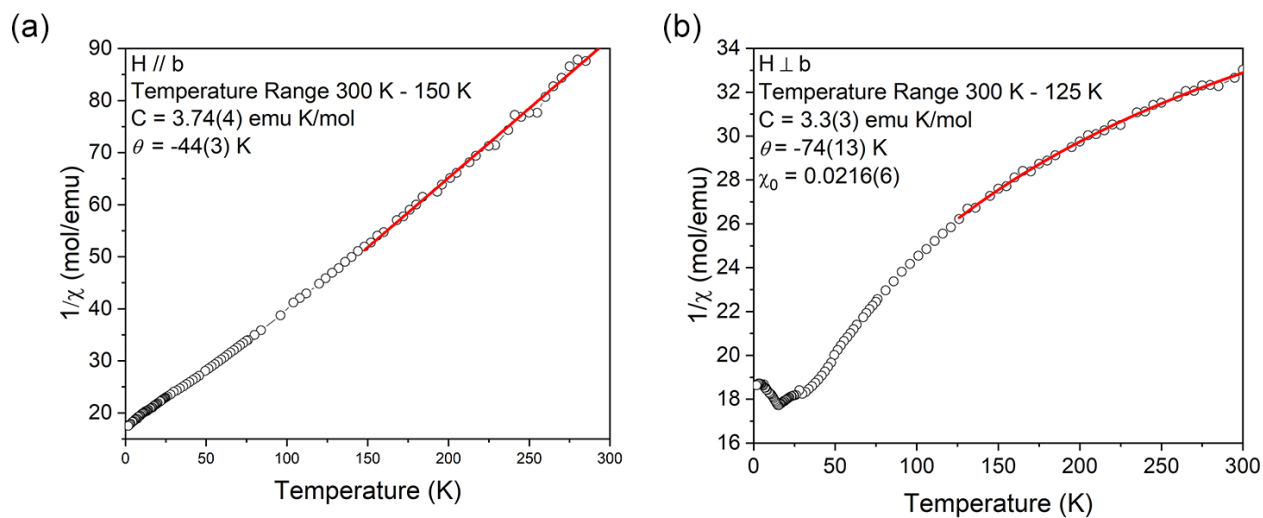

**Figure S2.** Curie-Weiss fitting for  $H \parallel b$  and  $H \perp b$  showing the inverse (a) and modified fit (b).

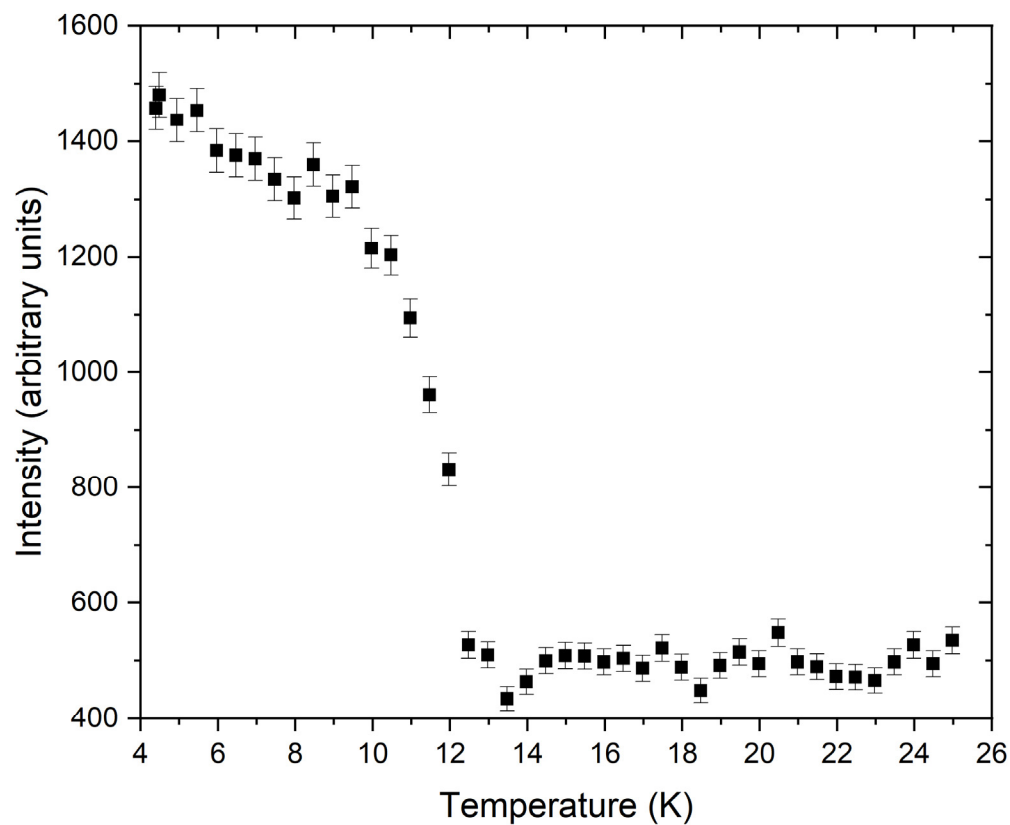

**Figure S3.** Intensity of the  $(0\ 0.356\ 2)$  neutron diffraction peak as a function of temperature.

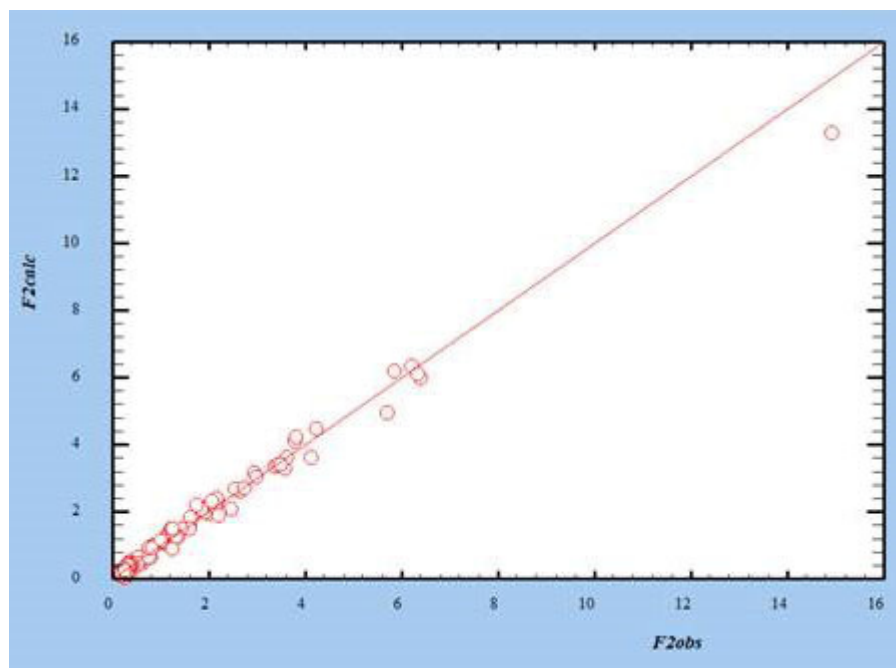

**Figure S4.** The correlation plot showing the agreement between the observed and calculated  $F^2$  values for the magnetic structure refinement of  $\text{MnBi}_2\text{Se}_4$ .
